# Supplementary material for: Food Insecurity Is Associated with Dietary Consumption during the COVID-19 Pandemic: Data from the Korea National Health and Nutrition Examination Survey 2019–2020
Source: MDPI journal article supplement (doi:10.3390/nu15030772), 2023-02-02
Supplement: s1 [file s1]

**Supplementary Table S1.** Distribution of study population not satisfied Dietary Reference Intakes of selected food and nutrients for Koreans according to food security level.

|               | 2019                   |                          |          | 2020                   |                          |          |
|---------------|------------------------|--------------------------|----------|------------------------|--------------------------|----------|
|               | Secure ( <i>n</i> , %) | Insecure ( <i>n</i> , %) | <i>p</i> | Secure ( <i>n</i> , %) | Insecure ( <i>n</i> , %) | <i>p</i> |
| Fruit         | 2387 (74.25)           | 116 (72.11)              | 0.6607   | 1938 (75.95)           | 107 (90.07)              | <.0001   |
| EER           | 1041 (31.55)           | 34 (19.50)               | 0.0032   | 776 (30.07)            | 21 (19.25)               | 0.0366   |
| Protein       | 1397 (38.05)           | 92 (58.33)               | <.0001   | 1104 (37.77)           | 77 (55.43)               | 0.0018   |
| Carbohydrate  | 1 (0.01)               | 0                        | -        | 0                      | 0                        | -        |
| Vitamin C     | 2768 (82.31)           | 139 (87.98)              | 0.0781   | 2228 (83.45)           | 119 (93.73)              | 0.0013   |
| Folate        | 2503 (74.63)           | 127 (78.78)              | 0.2609   | 2025 (76.45)           | 115 (88.30)              | 0.0147   |
| Dietary fiber | 1054 (36.35)           | 42 (30.00)               | 0.1991   | 791 (35.50)            | 49 (42.10)               | 0.2212   |
| Potassium     | 2592 (76.75)           | 137 (85.40)              | 0.0181   | 2024 (74.58)           | 117 (88.03)              | 0.0107   |

EER; Estimated Energy Requirement.

All statistical analyses performed taking account of the effect of complex sampling design and weight. *P* values were from Rao-Scott Chi-Squared tests. Recommended level of each food and nutrition consumption was determined following Dietary Reference Intakes for Koreans taking account of age and sex. Reference levels for protein, carbohydrate, vitamin C and folate were Estimated Average Requirement; for dietary fibre and potassium was Adequate Intake.
